# Supplementary material for: The occurrence of intracranial rhabdoid tumours in mice depends on temporal control of Smarcb1 inactivation
Source: PubMed Central journal article supplement (PMC4738337; doi:10.1038/ncomms10421), 2016-01-28
Supplement: ncomms10421-s1.pdf [file ncomms10421-s1.pdf]

# Supplementary Figure 1. Biological characteristics of *Smarcb1*<sup>flx/flx</sup>; Rosa26-Cre<sup>ERT2</sup>; Lymphomas

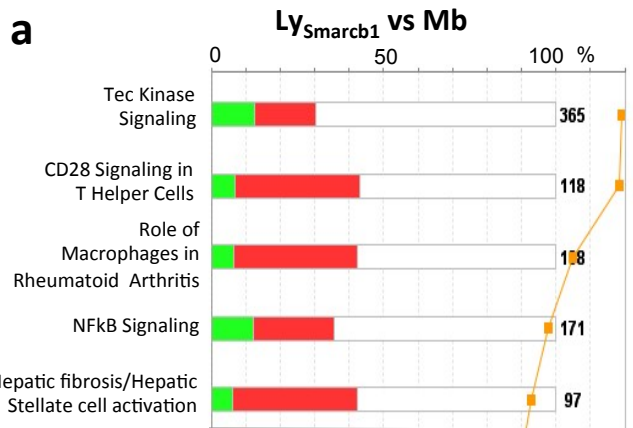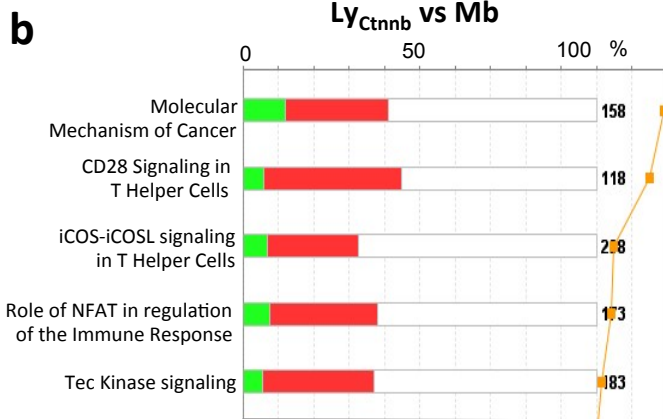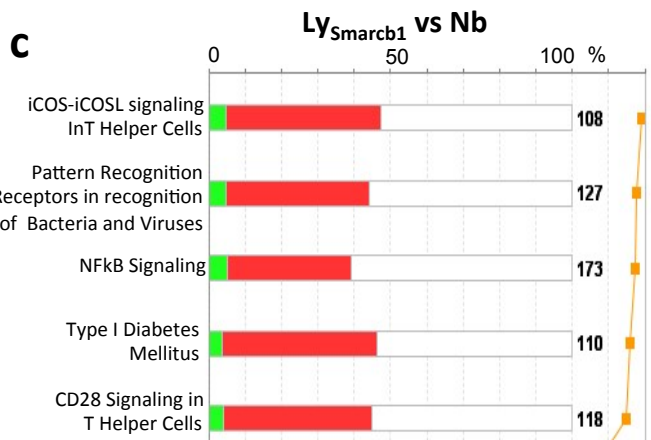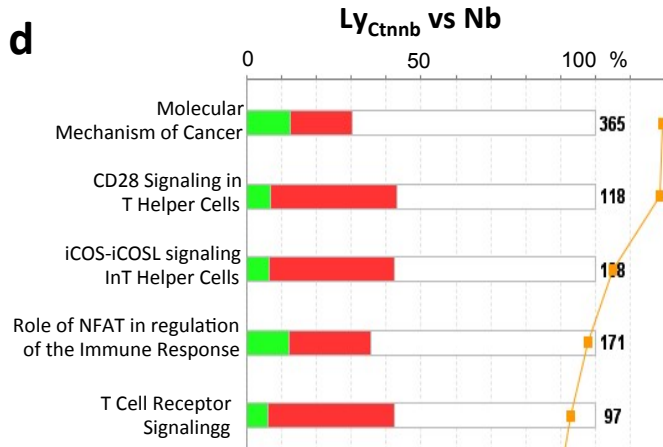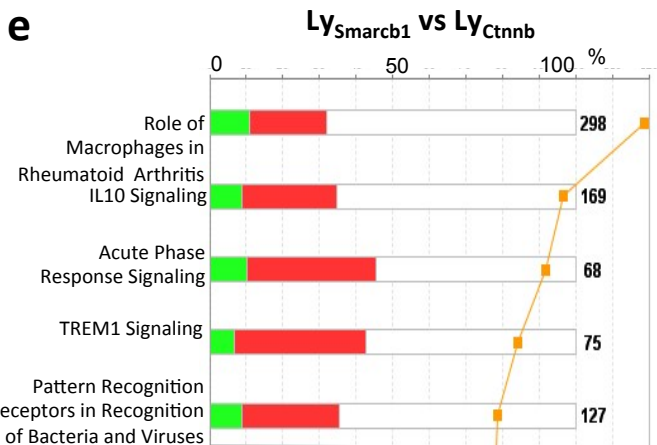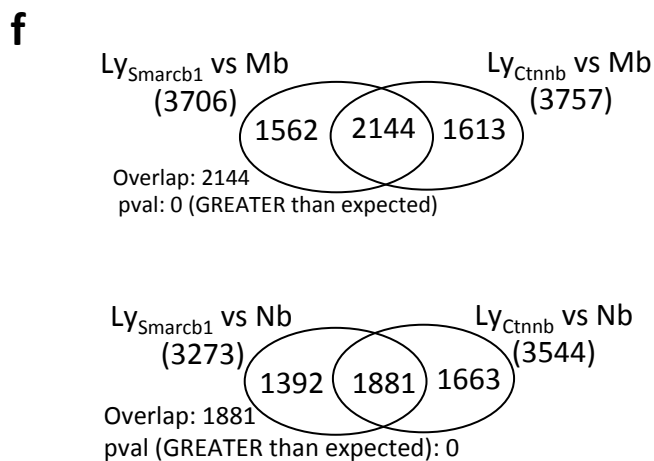

Ingenuity analyses of genes with significantly different expression (t-test analyses,  $p \leq 0.05$ , Fold Change  $|FC| \geq 1.2$ ) in *Smarcb1*-deficient mouse lymphomas (Lymph<sub>Smarcb1</sub>) as compared with Mb (a) and Nb (c); similar analyses comparing *Cttnb*<sup>del<sub>ex3</sub></sup> T-cell lymphomas (Lymph<sub>Cttnb1</sub>) with Mb (b) and Nb (d); similar analysis between the two types of lymphomas (e). Pathways are ranked from the most (up) to the less (down) significantly represented ones. The columns' length represents the percentage of genes in the pathway that are significantly differentially expressed. Genes involved in the pathways are numbered at the end of the columns. Genes overexpressed in lymphomas as compared with Mb are shown in red, under-expressed genes in green. The yellow curve indicates the p-value for each overrepresented pathway. (f) Significant overlaps of the differential expressions between each type of lymphomas and Mb (upper panel) and Nb (lower panels).

## Supplementary Figure 2. Rosa26-Cre dependent recombination throughout mouse development

**a**

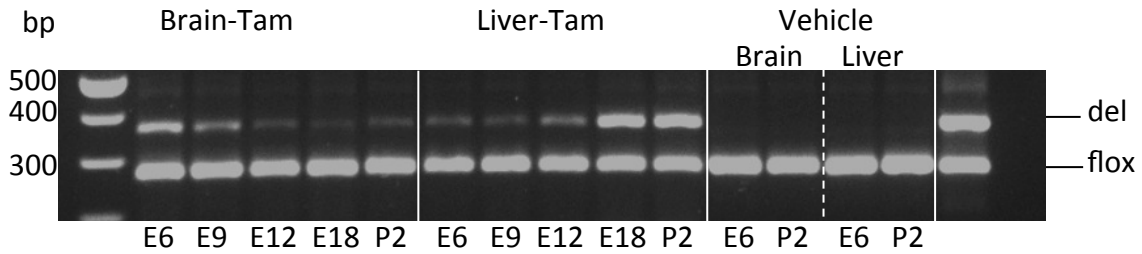

**b**

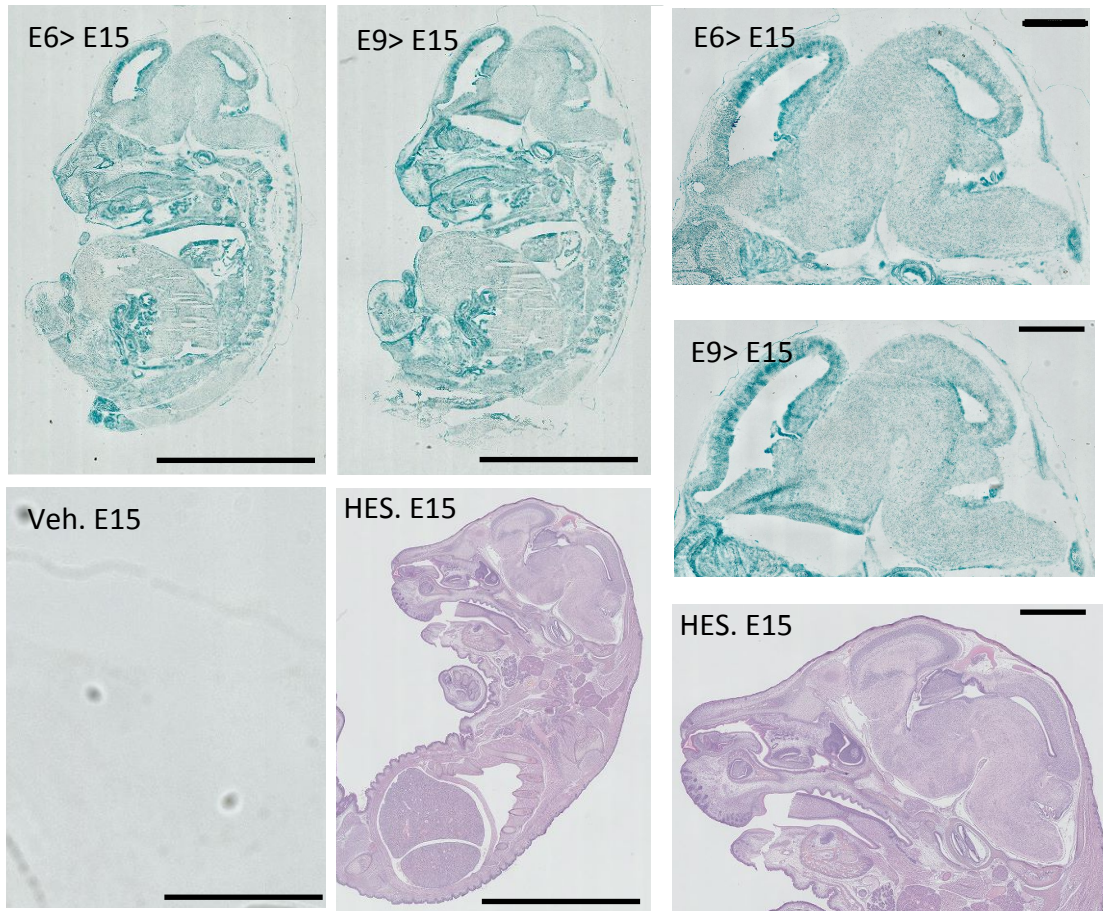

(a) Semi-quantitative PCR on mouse brains and livers, five days after treatment with tamoxifen (Tam, 1mg/20g) and vehicle at various time points (from E6 to birth). Del: deleted allele; flox: floxed allele. (b) Similar diffuse  $\beta$ -galactosidase staining in brains at E15 in Rosa26-Cre<sup>ERT2</sup>;Rosa26-LacZ mice treated with tamoxifen at E6 (left upper panel) and E9 (right upper panel) ; scale bars represent 5mm. HES staining of control mouse at E15. Right panel: higher magnification focusing on brains ; scale bars for high magnification represent 1mm

**Supplementary Figure 3. Tamoxifen injection at various stages of development**

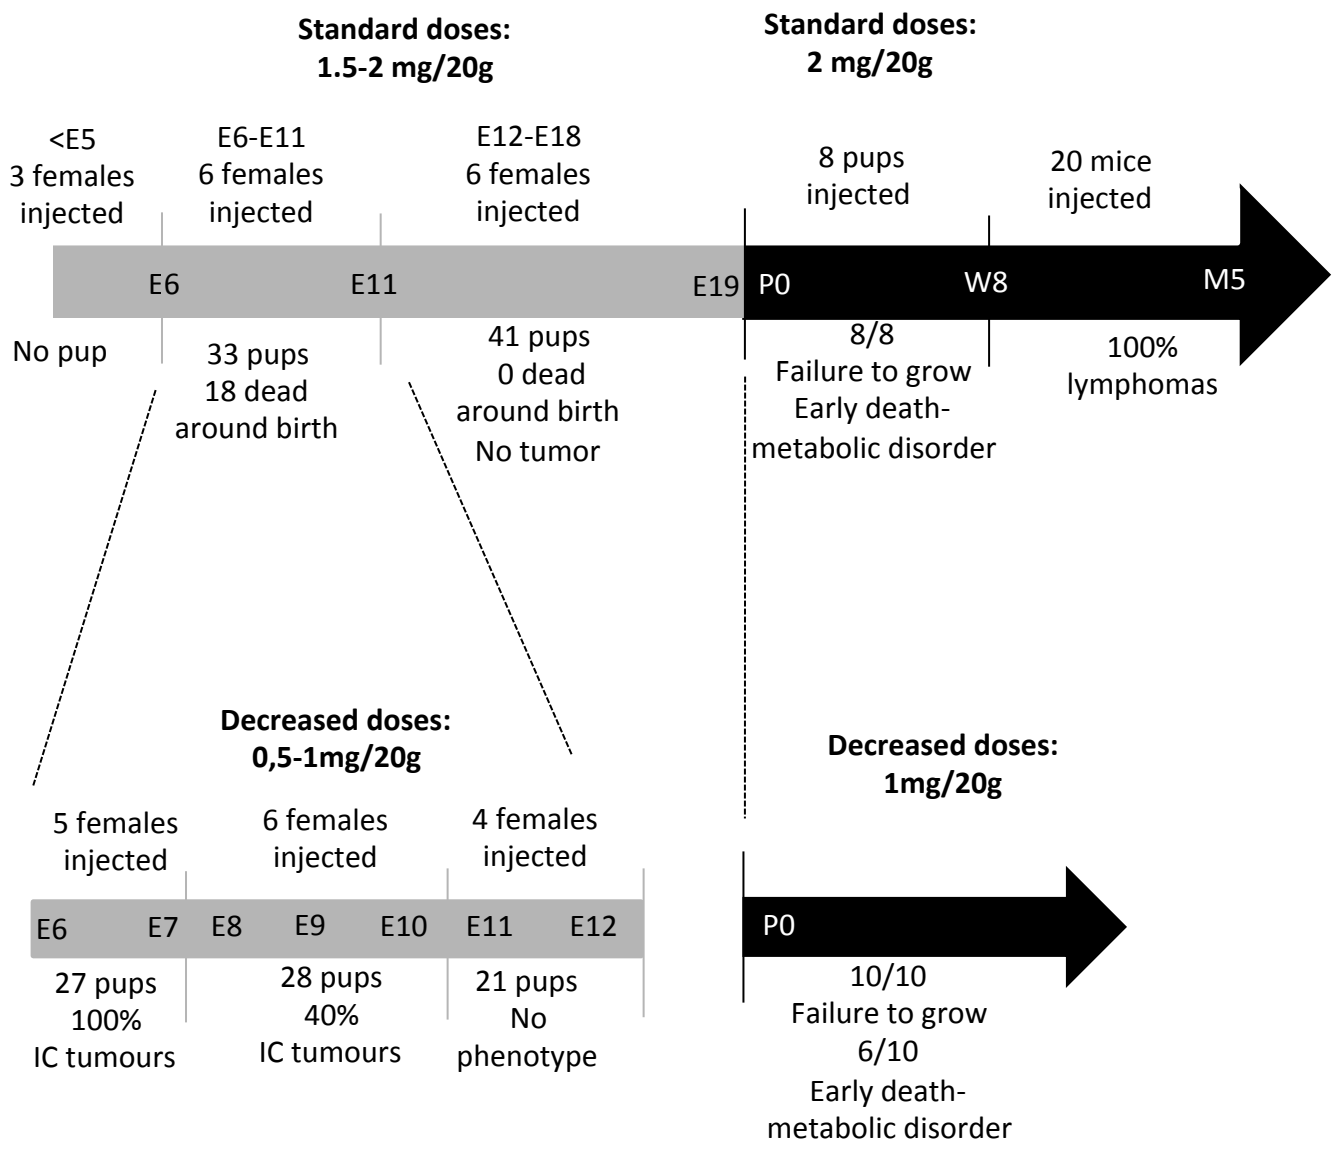

P0: birth day. W8: 8 weeks of life. M5: 5 months of life. Mice showed no phenotype when treated with tamoxifen from E12 to E18 with standard doses (1.5-2mg/20g); therefore, we didn't use reduced doses after E12.

**Supplementary Figure 4. Mouse intra-cranial tumors are split in two entities**

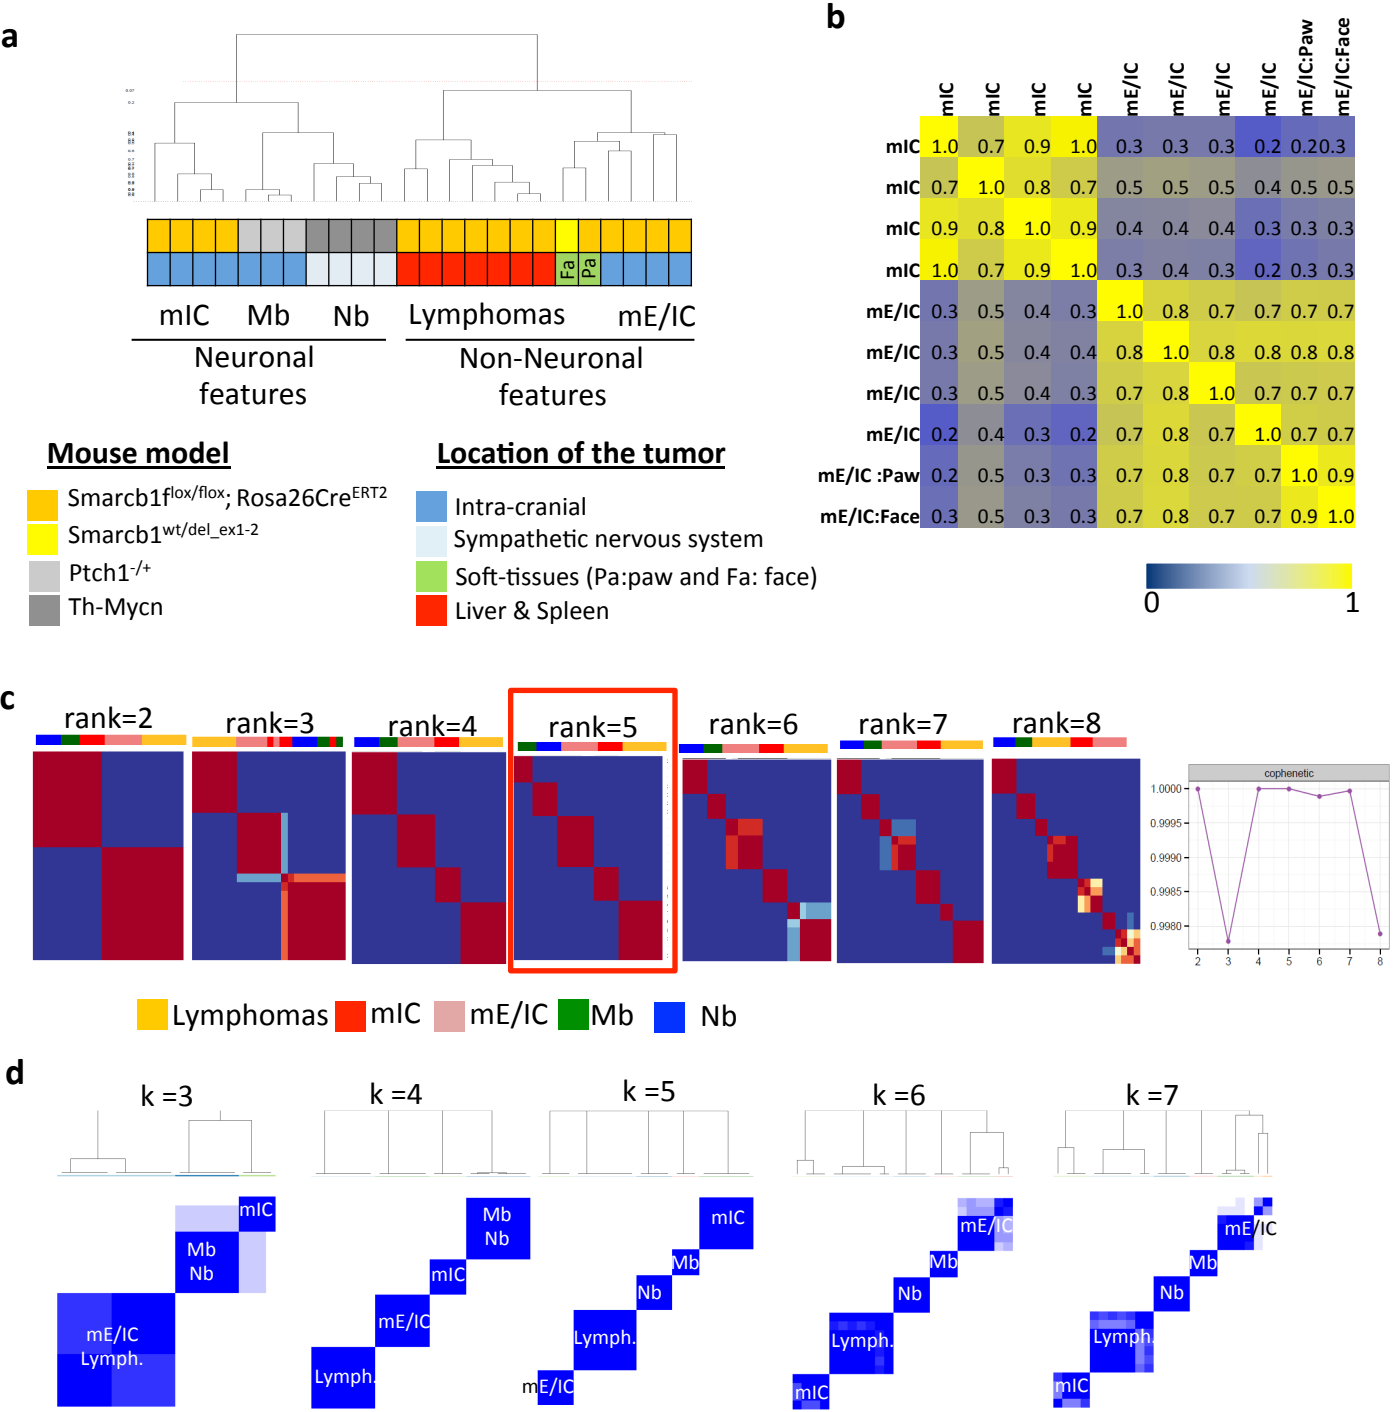

(a) Unsupervised hierarchical clustering on 3161 genes; mIC clusterize with neuronal tumors (Mb and Nb) while mE/IC clusterize with lymphomas (b) whole genome correlation between *Smarcb1*-deficient mouse tumors; a high correlation is found between intracranial tumors of the mE/IC group and the soft-tissue tumors. i.e. mE/IC arising in the paw (pa) and the face (fa). (c) Non Negative Matrix Factorization on the whole set of mouse *Smarcb1*-deficient tumors . Mb and Nb; the most robust and lowest number of clusters that split Mb from Nb is k=5: Mb, Nb, the Lymphoma group and 2 distinct groups within *Smarcb1*<sup>fl<sup>lox</sup>; Rosa26-Cre<sup>ERT2</sup> intracranial mouse tumors. (d) Consensus clustering on the same set of tumors showing that a number of clusters lower than 5 is unable to split Mb from Nb.</sup>

**Supplementary Figure 5. Human intra-cranial tumors are split in three entities**

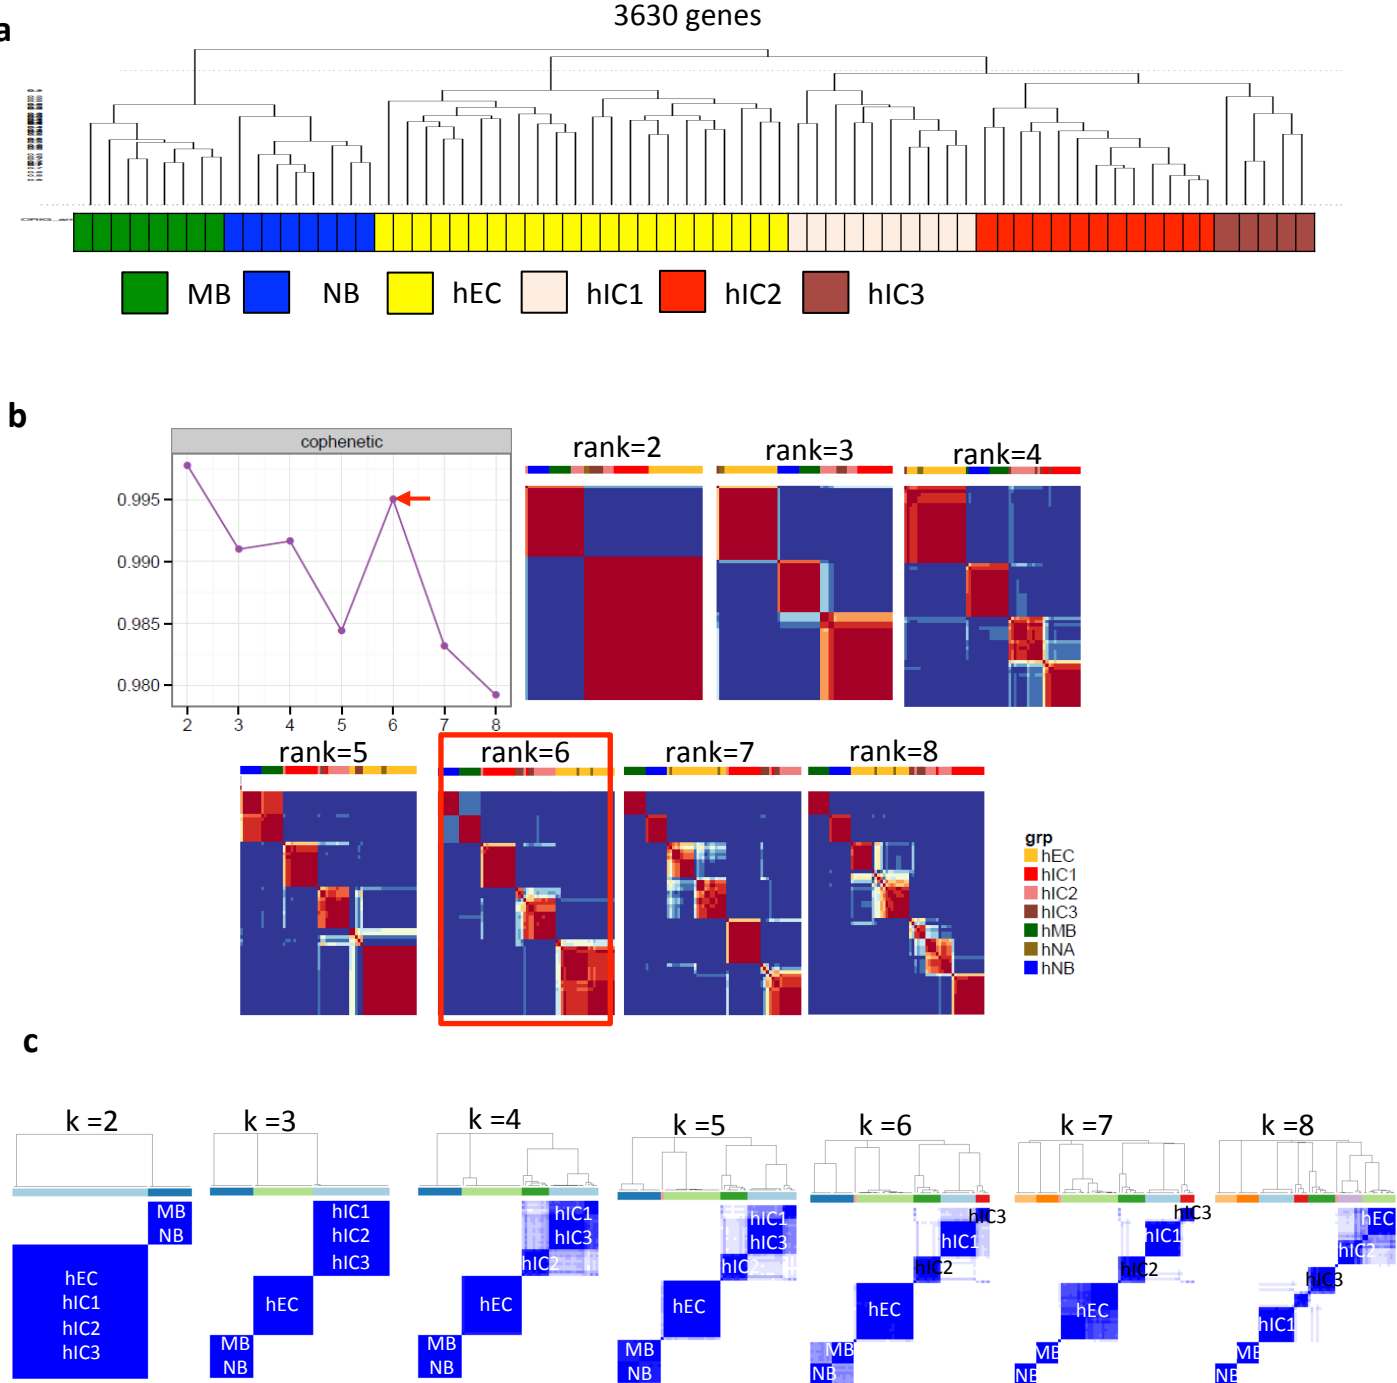

(a) Unsupervised hierarchical clustering on 3630 genes; 4 clusters within all *SMARCB1*-deficient tumors; hEC: human extra-cranial tumors; hIC: human extra-cranial tumors, groups 1, 2 and 3; MB: human medulloblastomas; NB: human neuroblastomas; NA: non assigned (b) Non Negative Matrix Factorization on the whole set of human *SMARCB1*-deficient tumors, MB and NB; the most robust (highest cophenetic coefficient) and lowest number of clusters that split MB from NB is 6, confirming 4 distinct groups within *SMARCB1*-deficient tumors. (c) Consensus clustering on the same set of tumors, showing that a number of cluster lower than 6 is unable to split MB from NB.

## Supplementary Figure 6. RT-PCR confirmation on a subset of selected genes

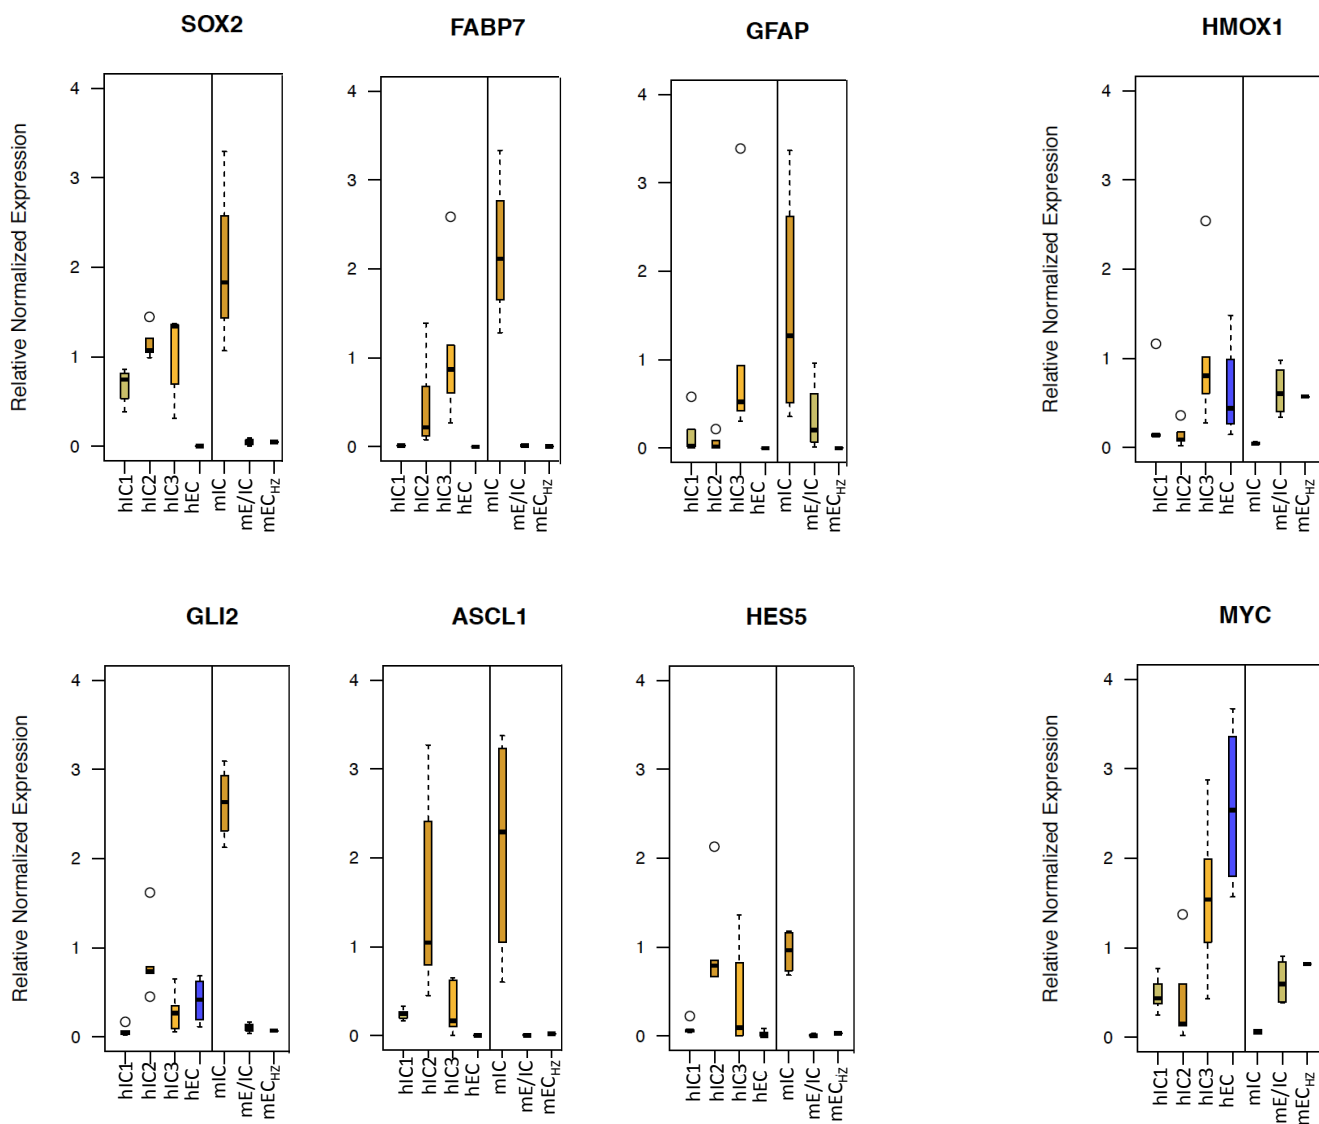

8 genes that distinguish mE/IC from mIC were assessed on human tumor subgroups (hEC, n=5 ; hIC1, n=5, hIC2, n=5, and hIC3, n=5) and mouse tumors subgroups (mIC, n=4, and mE/IC, n=4); the levels of expression in the face tumor from the heterozygous model (mEC<sub>HZ</sub>, n=1) are also separately depicted to show the similarity of their expression profile with other tumors from the mE/IC group. In box-plots, the central rectangle spans the first quartile to the third quartile (*interquartile range* or *IQR*); the horizontal line inside the rectangle shows the median; whiskers are taken to  $1.5 \times IQR$  from the quartile ; circles show outliers

Supplementary Figure 7. *ACTL6A* and *ACTL6B* RNA expression

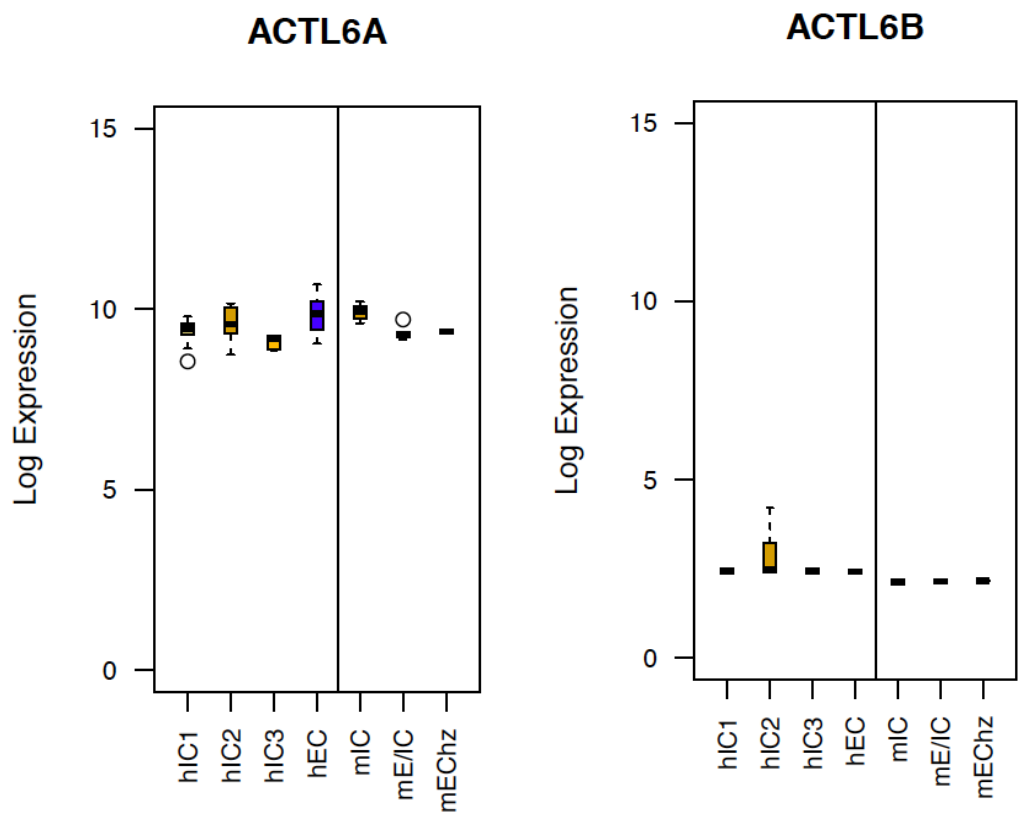

In box-plots, the central rectangle spans the first quartile to the third quartile (*interquartile range* or *IQR*); the horizontal line inside the rectangle shows the median; whiskers are taken to  $1.5 \times IQR$  from the quartile; circles show outliers hIC1, n=11; hIC2, n=12; hIC3, n=5; hEC, n=20; mIC, n=5; mE/IC, n=4; mEChz, n=1.

Supplementary Figure 8. Full gel showing the PCR results on wild type, knock out (KO) and floxed alleles of *Smarcb1*

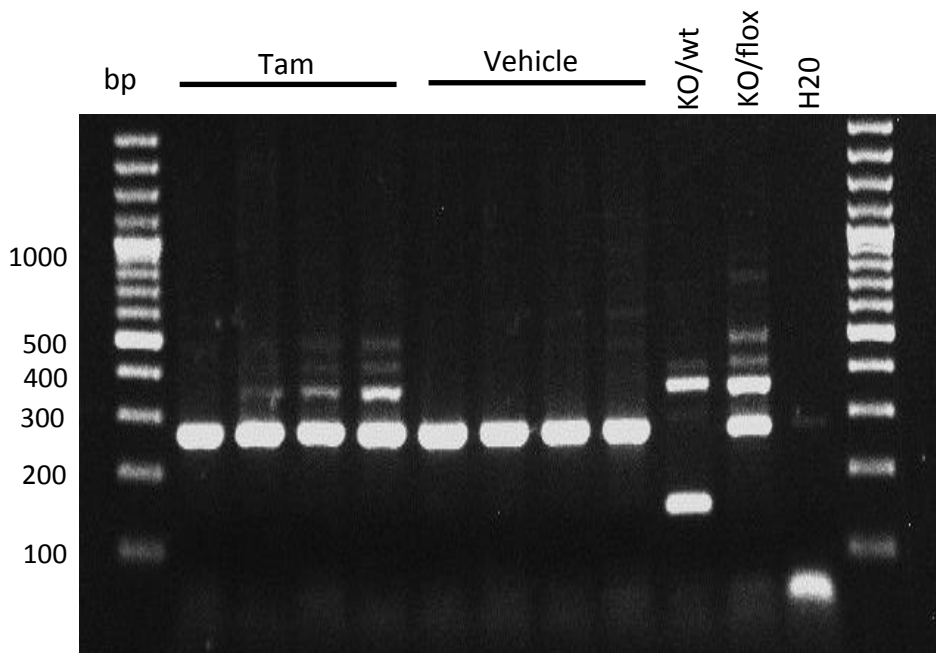

bp: base pair; Tam: tamoxifen; wt: wild type.



**Supplementary Table 1. Existing mouse models restrictedly based on *Smarcb1* inactivation**

|                                     | Genetic background                                        | Tumour penetrance | Phenotype                                                                 | Mean Latency   |
|-------------------------------------|-----------------------------------------------------------|-------------------|---------------------------------------------------------------------------|----------------|
| Guidi et al, Moll Cell Biol, 2001   | Promoter trap in intron 3                                 | 15%               | Head and neck soft-tissues tumours<br>Sarcomas, lymphoma                  | 25weeks        |
| Klochender-Yeivin et al, EMBO, 2000 | Deletion of exons 1 & 2                                   | 32%               | Intracranial paraspinal subcutaneous tumors<br>Pleomorphic Rhabdoid cells | 9 months       |
| Roberts et al, PNAS, 2000           | Deletion of exon1                                         | 6.5%              | Face and Neck soft-tissue tumors<br>Pleomorphic Rhabdoid cells            | 6 months       |
| Tsitikis et al, PNAS, 2005          | Deletion of exons 6&7                                     | 26%               | Face and neck Soft-tissue tumors<br>Pleomorphic Rhabdoid cells            | 11 months      |
| Roberts et al, Cancer Cell, 2002    | Conditionnal Inversion                                    | 100%              | Spleen and liver lymphomas                                                | 3months        |
| Moreno et al, J Neuroscience, 2015  | Promoter specific for granule cell precursors : Atoh1-Cre | 0%                | Cerebellum hypoplasia                                                     | Not applicable |

**Supplementary Table 2. Primers used for RT-PCR validation of gene expression**

|                    | Sense                     | Anti-sense                 |
|--------------------|---------------------------|----------------------------|
| <b>Human SOX2</b>  | GCCCCAGCAGACTTCACAT       | AGGGGCAGTGTGCCGTTAAT       |
| <b>Human FABP7</b> | TCATCAGGACTCTCAGCACATTCAA | CCATCCAGGCTAACAACAGACTTACA |
| <b>Human GFP</b>   | CAGAAGCTCCAGGATGAAACCAA   | GTGGCTTCATCTGCTTCCTGTCT    |
| <b>Human ASCL1</b> | CGTCCTGTGCCCCACCATCT      | GGGGCTGAGCGGGTCTGTA        |
| <b>Human HES5</b>  | GAAGCACAGCAAAGCCTTCGT     | GTAGCCTTCGCTGTAGTCCTGGT    |
| <b>Human GLI2</b>  | AAGTCACTCAAGGATTCTGCTCA   | GTTTTCCAGGATGGAGCCACTT     |
| <b>Human MYC</b>   | ACCACCAGCAGCGACTCTGA      | TCCAGCAGAAGGTGATCCAGACT    |
| <b>Human HMOX1</b> | CAGTCAGGCAGAGGGTGATAGAAGA | CTGCAACTCCTCAAAGAGCTGGAT   |
| <b>Mouse SOX2</b>  | CACATGGCCCAGCACTAC        | CCCTCCAATTCCTTGTATC        |
| <b>Mouse FABP7</b> | TGTAAGTCTGTGGTTTCGGTTG    | AGGGGCAGTGTGCCGTTAAT       |
| <b>Human FABP7</b> | TCATCAGGACTCTCAGCACATTCAA | AGCAACGATATCCCCAAAGG       |
| <b>Mouse GFP</b>   | GAAAACCGCATCACCATTCC      | CTTAATGACCTCACCATCCCG      |
| <b>Mouse ASCL1</b> | GACTTGAAGTCTATGGCGGG      | TTCCAAAGTCCATTCCCAGG       |
| <b>Mouse HES5</b>  | CGGTGGAGATGCTCAGTC        | CTTGGAGTTGGGCTGGTG         |
| <b>Mouse GLI2</b>  | GCTCCACACACCCGCAACA       | AAGTTTTCCAGGACAGAACCTTGA   |
| <b>Mouse MYC</b>   | ACCACCAGCAGCGACTCTGA      | GGAATGGAGATGAGCCCAGCT      |
| <b>Mouse HMOX1</b> | ACAGAGGAACACAAAGACCAG     | GTGTCTGGGATGAGCTAGTG       |
